# Supplementary material for: Multiplex immunohistochemistry elucidates increased distance between cytotoxic T cells and plasma cells in relapsed myeloma, and identifies Lag-3 as the most common checkpoint receptor on cytotoxic T cells of myeloma patients
Source: PubMed Central journal article supplement — Haematologica. 2023 Oct 19;109(5):1487–500. doi: 10.3324/haematol.2023.283344 (PMC11063850; doi:10.3324/haematol.2023.283344), 2023-10-19
Supplement: 2023_283344_NINKOVIC_SUPPL.pdf [file 2023_283344_NINKOVIC_SUPPL.pdf]

# Multiplex immunohistochemistry elucidates increased distance between cytotoxic T cells and plasma cells in relapsed myeloma, and identifies Lag-3 as the most common checkpoint receptor on cytotoxic T cells of myeloma patients

Slavisa Ninkovic,<sup>1,2,3</sup> Louise E Purton,<sup>2,3</sup> Simon J Harrison<sup>4,5</sup> and Hang Quach<sup>1,2</sup>

<sup>1</sup>Department of Haematology, St. Vincent's Hospital Melbourne, Melbourne; <sup>2</sup>Faculty of Medicine, University of Melbourne, St. Vincent's Hospital, Melbourne; <sup>3</sup>Stem Cell Regulation Unit, St. Vincent's Institute of Medical Research, Melbourne; <sup>4</sup>Clinical Haematology, Peter MacCallum Cancer Centre and The Royal Melbourne Hospital, Melbourne and <sup>5</sup>Sir Peter MacCallum Department of Oncology, University of Melbourne, Parkville, Victoria, Australia

**Correspondence:** S. Ninkovic  
[slavisa.ninkovic@svha.org.au](mailto:slavisa.ninkovic@svha.org.au)

**Received:** May 18, 2023.

**Accepted:** October 12, 2023.

**Early view:** October 19, 2023.

<https://doi.org/10.3324/haematol.2023.283344>

©2024 Ferrata Storti Foundation

Published under a CC BY-NC license

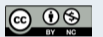

**Supplementary Table 1: Plasma cell percentage as reported by the diagnostic pathology laboratory by morphology [aspirate], trephine anti-CD138 chromogenic IHC estimation and as assessed by mIHC in this study.**

|                         | Aspirate    | Trephine<br>CD138 IHC | mIHC<br>CD138 | P value *                                                        |
|-------------------------|-------------|-----------------------|---------------|------------------------------------------------------------------|
| <b>MGUS (n=32)</b>      | 3.8 ± 2.7   | 6.5 ± 2.6             | 11.6 ± 7.8    | <0.0001<br>1 vs 2 = 0.0014<br>1 vs 3 < 0.0001<br>2 vs 3 = 0.3125 |
| <b>NDMM (n=65)</b>      | 23.3 ± 18.6 | 34.6 ± 25.2           | 36.1 ± 24.8   | <0.0001<br>1 vs 2 = 0.0026<br>1 vs 3 < 0.0001<br>2 vs 3 = 0.5220 |
| <b>RRMM (n=59)</b>      | 25.2 ± 30.1 | 33.4 ± 31.2           | 30.1 ± 26.2   | 0.0003<br>1 vs 2 = 0.0004<br>1 vs 3 = 0.0150<br>2 vs 3 = 0.9337  |
| <b>Combined (n=156)</b> | 20.0 ± 23.5 | 28.4 ± 27.4           | 28.8 ± 24.6   | <0.0001<br>1 vs 2 < 0.0001<br>1 vs 3 < 0.0001<br>2 vs 3 = 0.9654 |

Values represent plasma cell percentage mean ± SD unless otherwise specified. \*Friedman test one-way ANOVA for matched-measures, non-parametric data with corresponding Dunn's multiple comparisons tests shown where 1 = Aspirate, 2 = Trephine CD138, 3 = mIHC CD138 cohort.

**Supplementary Table 2: Summary of mIHC sub-group analyses.**

| Characteristic                                                                           | MGUS - Risk group comparison<br>Low/Inter. (n=21) vs. Inter.-High/High Risk (n=11) |                  |         | NDMM 2 - Response to 1 <sup>st</sup> line Rx<br>Response (n=41) vs. SOR & EP (n=18) |               |         | NDMM 2 - Extremes of response<br>< PR (n=12) vs. > CR (n=9) |               |               | RRMM - Number of prior lines (PL)<br>1 PL (n=22) vs. > 3 PL (n=15) |               |               | RRMM - Prior AutoSCT<br>No (n=25) vs. Yes (n=34) |               |               |
|------------------------------------------------------------------------------------------|------------------------------------------------------------------------------------|------------------|---------|-------------------------------------------------------------------------------------|---------------|---------|-------------------------------------------------------------|---------------|---------------|--------------------------------------------------------------------|---------------|---------------|--------------------------------------------------|---------------|---------------|
|                                                                                          | Low/Inter.                                                                         | Inter.-High/High | p-value | Response                                                                            | SOR & EP      | p-value | < PR                                                        | > CR          | P-value       | 1 PL                                                               | > 3 PL        | p-value       | No                                               | Yes           | p-value       |
| BM cellularity, %                                                                        | 46.8 ± 11.4                                                                        | 47.4 ± 12.8      | 0.8976  | 50.3 ± 17.0                                                                         | 58.3 ± 16.1   | 0.0965  | 60.6 ± 14.3                                                 | 47.8 ± 19.3   | 0.0970        | 49.9 ± 13.8                                                        | 54.0 ± 17.7   | 0.4394        | 55.3 ± 14.2                                      | 52.1 ± 15.8   | 0.4376        |
| Fat space, %                                                                             | 36.0 ± 9.4                                                                         | 35.1 ± 16.4      | 0.8468  | 36.4 ± 17.7                                                                         | 36.2 ± 16.0   | 0.9749  | 34.9 ± 15.4                                                 | 39.2 ± 20.4   | 0.5897        | 34.9 ± 11.3                                                        | 31.9 ± 15.4   | 0.4963        | 34.6 ± 12.6                                      | 32.7 ± 13.3   | 0.5850        |
| Total number of nucleated cells assessed                                                 | 32870 ± 21220                                                                      | 29026 ± 19038    | 0.6184  | 36839 ± 27075                                                                       | 48178 ± 29971 | 0.1571  | 51505 ± 31534                                               | 60880 ± 30162 | 0.5006        | 31794 ± 20601                                                      | 31962 ± 29816 | 0.4720        | 23877 ± 19831                                    | 40640 ± 28688 | <b>0.0149</b> |
| Plasma cells (PC), %                                                                     | 10.9 ± 8.0                                                                         | 13.0 ± 7.4       | 0.4694  | 35.3 ± 26.1                                                                         | 39.2 ± 20.9   | 0.5845  | 60.0 ± 21.7                                                 | 80.1 ± 14.5   | <b>0.0216</b> | 28.7 ± 22.7                                                        | 35.2 ± 35.2   | > 0.9999      | 32.5 ± 26.2                                      | 28.4 ± 26.5   | 0.4692        |
| Non-Plasma cells, %                                                                      | 89.1 ± 8.0                                                                         | 87.0 ± 7.4       | 0.4694  | 64.7 ± 26.1                                                                         | 60.8 ± 20.9   | 0.5845  | 39.9 ± 21.7                                                 | 19.0 ± 14.5   | <b>0.0216</b> | 71.3 ± 22.7                                                        | 64.8 ± 35.2   | > 0.9999      | 68.5 ± 26.2                                      | 71.6 ± 26.5   | 0.4692        |
| <b>CD3 and CD8 expression</b>                                                            |                                                                                    |                  |         |                                                                                     |               |         |                                                             |               |               |                                                                    |               |               |                                                  |               |               |
| CD3+ T-cells<br>(As % of all nucleated cells)                                            | 11.8 ± 4.9                                                                         | 17.8 ± 14.4      | 0.0909  | 11.5 ± 6.4                                                                          | 10.1 ± 5.3    | 0.4466  | 8.95 ± 5.3                                                  | 13.3 ± 8.4    | 0.1614        | 13.4 ± 8.4                                                         | 11.5 ± 10.3   | 0.1807        | 11.7 ± 8.9                                       | 11.1 ± 7.6    | 0.9818        |
| CD3+ CD8+ T-cells<br>(As % of all nucleated cells)                                       | 3.9 ± 2.7                                                                          | 5.0 ± 4.4        | 0.3708  | 3.3 ± 2.5                                                                           | 4.5 ± 4.0     | 0.1883  | 3.82 ± 4.5                                                  | 4.23 ± 2.6    | 0.3100        | 4.1 ± 2.8                                                          | 4.2 ± 5.5     | 0.4720        | 3.4 ± 2.7                                        | 4.1 ± 3.9     | 0.1860        |
| <b>Tim-3 expression</b>                                                                  |                                                                                    |                  |         |                                                                                     |               |         |                                                             |               |               |                                                                    |               |               |                                                  |               |               |
| Tim-3+ cell, %<br>(As % of all nucleated cells)                                          | 2.57 ± 2.6                                                                         | 1.8 ± 2.2        | 0.4113  | 3.78 ± 4.8                                                                          | 2.10 ± 2.5    | 0.1674  | 2.12 ± 2.9                                                  | 2.14 ± 1.7    | 0.8078        | 2.63 ± 3.8                                                         | 5.14 ± 7.9    | 0.4395        | 2.38 ± 3.5                                       | 3.87 ± 6.3    | 0.3953        |
| Tim-3+ CD3+CD8+ T-cell<br>(As % of all nucleated cells)                                  | 0.08 ± 0.08                                                                        | 0.07 ± 0.05      | 0.6794  | 0.14 ± 0.29                                                                         | 0.09 ± 0.11   | 0.4981  | 0.25 ± 0.6                                                  | 0.24 ± 0.3    | 0.4522        | 0.14 ± 0.22                                                        | 0.15 ± 0.33   | 0.6407        | 0.08 ± 0.20                                      | 0.15 ± 0.24   | 0.0581        |
| Tim-3+ CD3+CD8- T-cell<br>(As % of all nucleated cells)                                  | 0.34 ± 0.38                                                                        | 0.27 ± 0.30      | 0.5971  | 0.57 ± 0.78                                                                         | 0.24 ± 0.28   | 0.5665  | 0.19 ± 0.27                                                 | 0.45 ± 0.73   | 0.2469        | 0.59 ± 1.3                                                         | 0.50 ± 0.70   | 0.7483        | 0.47 ± 1.21                                      | 0.49 ± 0.77   | 0.9415        |
| <b>Lag-3 expression</b>                                                                  |                                                                                    |                  |         |                                                                                     |               |         |                                                             |               |               |                                                                    |               |               |                                                  |               |               |
| Lag-3+ cell, %<br>(As % of all nucleated cells)                                          | 5.8 ± 4.5                                                                          | 4.9 ± 3.1        | 0.5376  | 6.28 ± 8.4                                                                          | 5.09 ± 6.8    | 0.8148  | 5.34 ± 7.8                                                  | 4.35 ± 5.2    | 0.8078        | 5.11 ± 7.8                                                         | 4.65 ± 5.7    | 0.7025        | 6.14 ± 7.7                                       | 3.52 ± 4.2    | <b>0.0468</b> |
| Lag-3+ CD3+CD8+ T-cell<br>(As % of all nucleated cells)                                  | 0.29 ± 0.40                                                                        | 0.45 ± 0.47      | 0.3148  | 0.22 ± 0.25                                                                         | 0.33 ± 0.62   | 0.3167  | 0.25 ± 0.6                                                  | 0.24 ± 0.3    | 0.4522        | 0.41 ± 0.43                                                        | 0.13 ± 0.14   | <b>0.0250</b> | 0.37 ± 0.43                                      | 0.20 ± 0.26   | 0.1344        |
| Lag-3+ CD3+CD8- T-cell<br>(As % of all nucleated cells)                                  | 0.57 ± 0.90                                                                        | 1.11 ± 1.61      | 0.2186  | 0.85 ± 1.48                                                                         | 0.67 ± 1.41   | 0.6782  | 0.87 ± 1.7                                                  | 0.79 ± 1.0    | 0.4750        | 0.73 ± 0.90                                                        | 0.45 ± 0.77   | 0.2794        | 0.54 ± 0.82                                      | 0.53 ± 0.86   | 0.9738        |
| <b>PD-1 expression</b>                                                                   |                                                                                    |                  |         |                                                                                     |               |         |                                                             |               |               |                                                                    |               |               |                                                  |               |               |
| PD-1+ cell, %<br>(As % of all nucleated cells)                                           | 3.4 ± 4.8                                                                          | 3.6 ± 2.8        | 0.9279  | 5.17 ± 6.6                                                                          | 5.73 ± 11.9   | 0.8148  | 8.08 ± 14.2                                                 | 4.52 ± 4.4    | 0.9170        | 3.30 ± 3.0                                                         | 3.49 ± 6.5    | 0.3996        | 3.18 ± 3.8                                       | 3.39 ± 4.9    | 0.7929        |
| PD-1+ CD3+CD8+ T-cell<br>(As % of all nucleated cells)                                   | 0.12 ± 0.25                                                                        | 0.23 ± 0.33      | 0.2896  | 0.16 ± 0.32                                                                         | 0.11 ± 0.23   | 0.5083  | 0.15 ± 0.27                                                 | 0.16 ± 0.17   | 0.4743        | 0.16 ± 0.28                                                        | 0.14 ± 0.29   | 0.7767        | 0.11 ± 0.18                                      | 0.15 ± 0.28   | 0.9848        |
| PD-1+ CD3+CD8- T-cell<br>(As % of all nucleated cells)                                   | 0.76 ± 0.72                                                                        | 1.42 ± 1.72      | 0.1258  | 0.92 ± 1.4                                                                          | 0.85 ± 1.8    | 0.8796  | 0.86 ± 2.2                                                  | 0.81 ± 1.2    | 0.6646        | 1.40 ± 2.1                                                         | 0.85 ± 2.1    | <b>0.0380</b> | 1.30 ± 2.1                                       | 0.77 ± 1.4    | 0.1200        |
| <b>Absolute number of CD3+CD8+ T-cells within a specified distance from plasma cells</b> |                                                                                    |                  |         |                                                                                     |               |         |                                                             |               |               |                                                                    |               |               |                                                  |               |               |
| Within 25µm                                                                              | 649 ± 586                                                                          | 1408 ± 2668      | 0.2270  | 978 ± 1175                                                                          | 1968 ± 3270   | 0.0916  | 2064 ± 3912                                                 | 1682 ± 1594   | 0.5538        | 1010 ± 1181                                                        | 837 ± 1570    | 0.1886        | 507 ± 575                                        | 1192 ± 1492   | <b>0.0443</b> |
| Within 50µm                                                                              | 922 ± 739                                                                          | 1822 ± 3306      | 0.2485  | 1142 ± 1382                                                                         | 2131 ± 3315   | 0.1090  | 2198 ± 3957                                                 | 2164 ± 1935   | 0.4221        | 1152 ± 1267                                                        | 1343 ± 3297   | 0.0935        | 583 ± 597                                        | 1543 ± 2447   | <b>0.0242</b> |

|                                                                                     |             |             |        |             |             |        |             |             |        |             |             |               |             |              |               |
|-------------------------------------------------------------------------------------|-------------|-------------|--------|-------------|-------------|--------|-------------|-------------|--------|-------------|-------------|---------------|-------------|--------------|---------------|
| Within 100µm                                                                        | 1102 ± 823  | 2014 ± 3468 | 0.2672 | 1233 ± 1520 | 2216 ± 3358 | 0.1237 | 2238 ± 3959 | 2472 ± 2218 | 0.3824 | 1247 ± 1293 | 1847 ± 5083 | <b>0.0417</b> | 628 ± 595   | 1862 ± 3539  | <b>0.0150</b> |
| <b>Proportion of CD3+CD8+ T-cells within a specified distance from plasma cells</b> |             |             |        |             |             |        |             |             |        |             |             |               |             |              |               |
| Within 25µm                                                                         | 54.0 ± 21.2 | 56.0 ± 22.4 | 0.8188 | 76.7 ± 24.7 | 86.3 ± 16.8 | 0.1400 | 88.6 ± 10.2 | 64.7 ± 17.9 | 0.0010 | 69.2 ± 27.3 | 66.4 ± 36.5 | 0.8855        | 70.7 ± 26.4 | 66.2 ± 30.8  | 0.8062        |
| Within 50µm                                                                         | 77.4 ± 18.1 | 78.0 ± 23.1 | 0.9314 | 88.8 ± 17.8 | 94.6 ± 12.7 | 0.2143 | 97.0 ± 2.79 | 85.1 ± 8.4  | 0.0024 | 83.6 ± 21.3 | 76.7 ± 33.7 | 0.9681        | 84.9 ± 19.5 | 79.0 ± 26.7  | 0.6825        |
| Within 100µm                                                                        | 93.6 ± 18.4 | 91.2 ± 18.4 | 0.6414 | 96.3 ± 9.8  | 97.5 ± 9.5  | 0.6735 | 99.7 ± 0.54 | 97.4 ± 2.2  | 0.0028 | 94.8 ± 10.4 | 85.7 ± 29.3 | 0.8364        | 95.8 ± 8.1  | 89.6 ± 20.8  | 0.3697        |
| Average distance to a PC from each CD3+CD8+ T-cell                                  | 36.7 ± 20.7 | 40.9 ± 41.2 | 0.7035 | 25.4 ± 35.8 | 20.4 ± 28.9 | 0.6024 | 14.3 ± 6.4  | 26.9 ± 9.1  | 0.0043 | 29.0 ± 26.2 | 149 ± 442.3 | 0.9108        | 27.0 ± 21.4 | 82.3 ± 288.6 | 0.8152        |
| Average distance to a CD3+CD8+ T-cell from each plasma cell                         | 51.2 ± 29.6 | 50.1 ± 22.7 | 0.9139 | 79.2 ± 67.6 | 67.2 ± 71.9 | 0.5399 | 82.1 ± 84.7 | 44.7 ± 26.1 | 0.1694 | 107.2 ± 248 | 53.6 ± 22.4 | 0.6888        | 61.6 ± 38.5 | 122 ± 283    | 0.3472        |
| Average number of CD3+CD8+ T-cells within 100µm of a PC                             | 1.76 ± 0.75 | 1.78 ± 0.41 | 0.9618 | 1.36 ± 0.42 | 1.29 ± 0.34 | 0.5578 | 1.27 ± 0.28 | 1.54 ± 0.37 | 0.0491 | 1.51 ± 0.78 | 2.07 ± 2.5  | 0.4703        | 1.37 ± 0.33 | 1.82 ± 1.72  | 0.5125        |
| Proportion of unique plasma cells, %                                                | 25.3 ± 16.2 | 26.1 ± 15.7 | 0.9027 | 12.3 ± 12.7 | 10.5 ± 9.8  | 0.6067 | 8.26 ± 0.79 | 16.1 ± 8.2  | 0.0118 | 16.8 ± 17.4 | 23.3 ± 33.3 | 0.4703        | 12.5 ± 11.3 | 19.5 ± 25.3  | 0.6401        |
| Proportion of unique CD3+CD8+ T-cells                                               | 59.9 ± 20.6 | 55.1 ± 20.8 | 0.5530 | 79.5 ± 21.2 | 82.9 ± 19.4 | 0.5681 | 84.5 ± 15.3 | 67.6 ± 18.3 | 0.0409 | 73.6 ± 22.8 | 68.5 ± 37.0 | 0.5748        | 77.8 ± 19.7 | 69.0 ± 30.1  | 0.5887        |

**Supplementary Table 3: Summary of mIHC results comparing MGUS cohort by <10% plasma cells with ≥ 10% by mIHC.**

| Characteristic                                                                           | MGUS Reclassified by mIHC PC%<br><10% PCs by mIHC (n=16) vs.<br>≥10% PCs by mIHC (n=16) |                  |           |
|------------------------------------------------------------------------------------------|-----------------------------------------------------------------------------------------|------------------|-----------|
|                                                                                          | <10% PCs by mIHC                                                                        | ≥10% PCs by mIHC | p-value   |
| <b>BM cellularity, %</b>                                                                 | 48.6 ± 10.8                                                                             | 45.4 ± 12.8      | 0.451     |
| <b>Fat space, %</b>                                                                      | 33.8 ± 9.8                                                                              | 37.6 ± 13.9      | 0.838     |
| <b>Total number of nucleated cells assessed</b>                                          | 35,401 ± 22,705                                                                         | 27,697 ± 17,377  | 0.149     |
| <b>Plasma cells (PC), %</b>                                                              | 4.9 ± 2.7                                                                               | 18.3 ± 4.6       | <0.0001 * |
| <b>Non-Plasma cells, %</b>                                                               | 95.1 ± 2.7                                                                              | 81.7 ± 4.6       | <0.0001 * |
| <b>CD3 and CD8 expression</b>                                                            |                                                                                         |                  |           |
| <b>CD3+ T-cells (As % of all nucleated cells)</b>                                        | 10.0 ± 3.8                                                                              | 17.8 ± 11.9      | 0.0022 *  |
| <b>CD3+ CD8+ T-cells(As % of all nucleated cells)</b>                                    | 3.16 ± 2.0                                                                              | 5.4 ± 4.1        | 0.061     |
| <b>Tim-3 expression</b>                                                                  |                                                                                         |                  |           |
| <b>Tim-3+ cell, % (As % of all nucleated cells)</b>                                      | 2.6 ± 2.6                                                                               | 2.0 ± 2.3        | 0.809     |
| <b>Tim-3+ CD3+CD8+ T-cell (As % of all nucleated cells)</b>                              | 0.07 ± 0.07                                                                             | 0.09 ± 0.08      | 0.428     |
| <b>Tim-3+ CD3+CD8- T-cell (As % of all nucleated cells)</b>                              | 0.30 ± 0.35                                                                             | 0.33 ± 0.37      | 0.423     |
| <b>Lag-3 expression</b>                                                                  |                                                                                         |                  |           |
| <b>Lag-3+ cell, % (As % of all nucleated cells)</b>                                      | 4.6 ± 3.6                                                                               | 6.4 ± 4.4        | 0.231     |
| <b>Lag-3+ CD3+CD8+ T-cell (As % of all nucleated cells)</b>                              | 0.19 ± 0.16                                                                             | 0.51 ± 0.54      | 0.075     |
| <b>Lag-3+ CD3+CD8- T-cell (As % of all nucleated cells)</b>                              | 0.44 ± 0.64                                                                             | 1.10 ± 1.51      | 0.058     |
| <b>PD-1 expression</b>                                                                   |                                                                                         |                  |           |
| <b>PD-1+ cell, % (As % of all nucleated cells)</b>                                       | 2.7 ± 4.0                                                                               | 4.3 ± 4.4        | 0.270     |
| <b>PD-1+ CD3+CD8+ T-cell (As % of all nucleated cells)</b>                               | 0.07 ± 0.12                                                                             | 0.24 ± 0.36      | 0.121     |
| <b>PD-1+ CD3+CD8- T-cell (As % of all nucleated cells)</b>                               | 0.54 ± 0.56                                                                             | 1.43 ± 1.43      | 0.0136 *  |
| <b>Absolute number of CD3+CD8+ T-cells within a specified distance from plasma cells</b> |                                                                                         |                  |           |
| <b>Within 25µm</b>                                                                       | 365.5 ± 335.7                                                                           | 1438 ± 2142      | 0.004 *   |
| <b>Within 50µm</b>                                                                       | 634.7 ± 513.9                                                                           | 1809 ± 2674      | 0.037 *   |
| <b>Within 100µm</b>                                                                      | 874.8 ± 669.6                                                                           | 1938 ± 2827      | 0.149     |
| <b>Proportion of CD3+CD8+ T-cells within a specified distance from plasma cells</b>      |                                                                                         |                  |           |
| <b>Within 25µm</b>                                                                       | 37.7 ± 15.5                                                                             | 71.6 ± 8.8       | <0.0001 * |
| <b>Within 50µm</b>                                                                       | 64.5 ± 19.5                                                                             | 90.7 ± 6.0       | <0.0001 * |
| <b>Within 100µm</b>                                                                      | 86.7 ± 15.9                                                                             | 98.8 ± 1.4       | <0.0001 * |

|                                                                    |             |             |           |
|--------------------------------------------------------------------|-------------|-------------|-----------|
| <b>Average distance to a PC from each CD3+CD8+ T-cell</b>          | 54.0 ± 32.9 | 22.1 ± 5.5  | <0.0001 * |
| <b>Average distance to a CD3+CD8+ T-cell from each plasma cell</b> | 56.2 ± 28.5 | 45.6 ± 25.5 | 0.174     |
| <b>Average number of CD3+CD8+ T-cells within 100µm of a PC</b>     | 2.03 ± 0.8  | 1.51 ± 0.3  | 0.013 *   |
| <b>Proportion of unique plasma cells, %</b>                        | 32.6 ± 17.8 | 18.5 ± 9.6  | 0.017 *   |
| <b>Proportion of unique CD3+CD8+ T-cells</b>                       | 47.1 ± 18.9 | 69.5 ± 15.5 | 0.001 *   |
